# Supplementary material for: Genome-wide identification and expression profiling of durian CYPome related to fruit ripening
Source: PubMed Central journal article supplement (PMC8631664; doi:10.1371/journal.pone.0260665), 2021-11-30
Supplement: pone.0260665.s005.pdf [file pone.0260665.s005.pdf]

**S2 Table.** Primer list for RT-qPCR

| Gene name        | Accession no. | Primer (5'-3')                                           |
|------------------|---------------|----------------------------------------------------------|
| <i>CYP71</i>     | XP_022718112  | F = GTCAAAGAAACCCCTCAGACTAC<br>R = CAGCACCAAACGGGATAAA   |
| <i>CYP71AS</i>   | XP_022725705  | F = CGATCTCGATCAGCTTCAATAC<br>R = GGGAGAATTCTTCTGGGTTATT |
| <i>CYP72A</i>    | XP_022738158  | F = CCAAGCTGGGAAATTTGTGT<br>R = GCCAATTTTCGATTCAAGCAT    |
| <i>CYP75B</i>    | XP_022736366  | F = CTGTGAGATCAATGGCTACC<br>R = AGCTCATACCAGCACATATTC    |
| <i>CYP81B</i>    | XP_022716967  | F = AACCACACCAGCCTTACCTG<br>R = TCATCAGGTTTCAGCATCAGC    |
| <i>CYP81D</i>    | XP_022725825  | F = TCTTCTGCTTCCACATATGC<br>R = ACCCAAATGGCATTAGCTTG     |
| <i>CYP81Q</i>    | XP_022740236  | F = AGTTTCAAGCCGAAAGGTT<br>R = TCGCCTCTAATGGCTCAACT      |
| <i>CYP84A</i>    | XP_022763185  | F = AACCGAGCAGTACGGTATGG<br>R = CCGTTTTTCGACTGAACACCT    |
| <i>CYP88A</i>    | XP_022738013  | F = CTCCTGGTTTTACGTTCCA<br>R = GCGAACAAGATCAGCAACAA      |
| <i>CYP94D</i>    | XP_022764670  | F = CACAAGGTTGATTCCGGTCT<br>R = ACTAAGCGTGGCAGCATCTT     |
| <i>CYP707A</i>   | XP_022755802  | F = GAGGATTGCTGGGAGTTATG<br>R = GTTGAATACCTTCTTGTCTCTTG  |
| <i>CYP714E</i>   | XP_022743116  | F = TTGGCAGGCTATGAGACTA<br>R = TCGGAAGTGGAGGGTAAA        |
| * <i>DzEF-1α</i> | XM_022889169  | F = GAAACCTTCTCTGCGTACC<br>R = CTCCACACTCTTGATGACAC      |
| ** <i>DzACT</i>  | XM_022897008  | F = AATGAGCAAAAAGGGTCAGCAC<br>R = GTCTTCAAAGTCAGCAGCCAG  |

\*Durian elongation factor 1 alpha (first reference gene)

\*\*Durian actin (second reference gene)
