# Supplementary material for: Genome-wide identification and expression profiling of durian CYPome related to fruit ripening
Source: PubMed Central journal article supplement (PMC8631664; doi:10.1371/journal.pone.0260665), 2021-11-30
Supplement: pone.0260665.s006.pdf [file pone.0260665.s006.pdf]

**S3 Table.** Comparison of P450 families in durian and selected flowering plants in the reversed order of angiosperm evolution: Brassicaceae, Malvaceae, Rosaceae, Fabaceae, Cucurbitaceae, Vitaceae, Solanaceae, Poaceae, and Musaceae. The column of durian P450 number is highlight in yellow.

| CYP family | <i>Arabidopsis</i> | Durian | Cotton | Cocoa | Strawberry | Apple | Soybean | Cucumber | Watermelon | Grape | Tomato | Rice | Banana |
|------------|--------------------|--------|--------|-------|------------|-------|---------|----------|------------|-------|--------|------|--------|
| clan 71    |                    |        |        |       |            |       |         |          |            |       |        |      |        |
| 71         | 54                 | 34     | 55     | 41    | 24         | 50    | 122     | 27       | 27         | 24    | 101    | 105  | 34     |
| 73         | 1                  | 2      | 2      | 3     | 3          | 2     | 5       | 3        | 5          | 3     | 3      | 4    | 6      |
| 75         | 1                  | 6      | 2      | 2     | 2          | 2     | 12      | 1        | 1          | 11    | 2      | 3    | 9      |
| 76         | 9                  | 14     | 16     | 14    | 4          | 16    | 43      | 8        | 8          | 24    | 43     | 38   | 2      |
| 77         | 7                  | 4      | 6      | 2     | 2          | 3     | 4       | 3        | 3          | 2     | 3      | 2    | 4      |
| 78         | 6                  | 12     | 15     | 6     | 6          | 10    | 19      | 5        | 5          | 7     | 6      | 8    | 13     |
| 79         | 12                 | 8      | 14     | 13    | 3          | 3     | 9       | 6        | 10         | 9     | 11     | 4    | 0      |
| 80         | 0                  | 0      | 0      | 0     | 0          | 0     | 0       | 3        | 3          | 6     | 7      | 0    | 0      |
| 81         | 18                 | 26     | 20     | 26    | 9          | 11    | 31      | 19       | 21         | 21    | 14     | 13   | 10     |
| 82         | 5                  | 21     | 41     | 28    | 9          | 27    | 33      | 13       | 21         | 34    | 16     | 0    | 0      |
| 83         | 2                  | 4      | 13     | 17    | 0          | 0     | 23      | 0        | 0          | 0     | 0      | 0    | 2      |
| 84         | 2                  | 5      | 4      | 3     | 3          | 3     | 6       | 3        | 3          | 3     | 1      | 4    | 4      |
| 89         | 7                  | 13     | 9      | 13    | 3          | 12    | 12      | 10       | 6          | 14    | 6      | 20   | 5      |
| 92         | 0                  | 1      | 5      | 2     | 4          | 5     | 2       | 3        | 3          | 6     | 13     | 14   | 4      |
| 93         | 1                  | 7      | 5      | 7     | 6          | 4     | 36      | 2        | 2          | 4     | 1      | 7    | 1      |
| 98         | 3                  | 2      | 2      | 1     | 2          | 6     | 3       | 1        | 1          | 1     | 6      | 3    | 2      |
| 99         | 0                  | 0      | 0      | 0     | 0          | 0     | 0       | 0        | 0          | 0     | 0      | 2    | 0      |
| 701        | 1                  | 1      | 3      | 1     | 2          | 4     | 2       | 1        | 1          | 1     | 1      | 4    | 1      |
| 703        | 1                  | 1      | 1      | 1     | 1          | 1     | 2       | 1        | 1          | 1     | 1      | 1    | 1      |
| 705        | 26                 | 0      | 0      | 0     | 0          | 0     | 0       | 0        | 0          | 0     | 0      | 0    | 0      |
| 706        | 7                  | 8      | 29     | 9     | 7          | 5     | 7       | 5        | 6          | 9     | 17     | 2    | 2      |
| 712        | 2                  | 3      | 4      | 6     | 1          | 0     | 3       | 5        | 5          | 2     | 1      | 0    | 0      |
| 723        | 0                  | 0      | 0      | 0     | 0          | 0     | 0       | 0        | 0          | 0     | 0      | 3    | 0      |
| 736        | 0                  | 14     | 14     | 10    | 4          | 20    | 27      | 14       | 5          | 8     | 25     | 0    | 0      |
| clan 51    |                    |        |        |       |            |       |         |          |            |       |        |      |        |
| 51         | 2                  | 3      | 2      | 1     | 1          | 2     | 4       | 1        | 1          | 2     | 4      | 12   | 2      |
| clan 72    |                    |        |        |       |            |       |         |          |            |       |        |      |        |
| 72         | 10                 | 10     | 10     | 8     | 10         | 12    | 30      | 9        | 7          | 22    | 43     | 17   | 17     |
| 709        | 3                  | 2      | 0      | 1     | 0          | 0     | 0       | 0        | 0          | 1     | 0      | 14   | 4      |
| 714        | 2                  | 17     | 7      | 10    | 7          | 11    | 18      | 3        | 3          | 6     | 3      | 6    | 3      |
| 715        | 1                  | 4      | 3      | 1     | 2          | 1     | 7       | 2        | 2          | 1     | 2      | 4    | 2      |
| 721        | 1                  | 2      | 4      | 2     | 1          | 5     | 8       | 3        | 4          | 5     | 2      | 2    | 1      |
| 734        | 1                  | 2      | 3      | 1     | 1          | 1     | 3       | 3        | 2          | 2     | 3      | 5    | 5      |
| 735        | 2                  | 1      | 2      | 1     | 1          | 2     | 5       | 2        | 2          | 1     | 2      | 2    | 2      |
| 749        | 0                  | 21     | 44     | 11    | 16         | 16    | 0       | 3        | 3          | 0     | 3      | 0    | 0      |
| clan 74    |                    |        |        |       |            |       |         |          |            |       |        |      |        |
| 74         | 2                  | 0      | 8      | 3     | 3          | 3     | 17      | 4        | 4          | 7     | 7      | 6    | 8      |
| clan 85    |                    |        |        |       |            |       |         |          |            |       |        |      |        |
| 85         | 2                  | 4      | 3      | 2     | 1          | 2     | 12      | 2        | 1          | 2     | 2      | 1    | 4      |

| CYP family | Arabidopsis | Durian | Cotton | Cocoa | Strawberry | Apple | Soybean | Cucumber | Watermelon | Grape | Tomato | Rice | Banana |
|------------|-------------|--------|--------|-------|------------|-------|---------|----------|------------|-------|--------|------|--------|
| 87         | 2           | 8      | 11     | 9     | 4          | 4     | 4       | 4        | 8          | 7     | 5      | 12   | 2      |
| 88         | 2           | 5      | 7      | 6     | 4          | 2     | 4       | 12       | 9          | 2     | 5      | 1    | 2      |
| 90         | 4           | 8      | 6      | 4     | 3          | 6     | 17      | 5        | 7          | 4     | 4      | 5    | 10     |
| 702        | 6           | 0      | 0      | 0     | 0          | 0     | 0       | 0        | 0          | 0     | 0      | 0    | 0      |
| 707        | 4           | 15     | 7      | 4     | 7          | 7     | 16      | 6        | 5          | 5     | 4      | 3    | 6      |
| 708        | 4           | 0      | 0      | 0     | 0          | 0     | 0       | 0        | 0          | 0     | 0      | 0    | 0      |
| 716        | 2           | 11     | 5      | 8     | 7          | 10    | 11      | 1        | 2          | 15    | 10     | 0    | 0      |
| 718        | 1           | 1      | 1      | 1     | 1          | 2     | 2       | 1        | 1          | 0     | 1      | 0    | 0      |
| 720        | 1           | 0      | 0      | 1     | 1          | 1     | 5       | 1        | 1          | 1     | 1      | 0    | 1      |
| 722        | 1           | 2      | 2      | 3     | 3          | 2     | 4       | 2        | 2          | 1     | 2      | 1    | 1      |
| 724        | 1           | 4      | 2      | 2     | 2          | 2     | 3       | 1        | 2          | 2     | 2      | 1    | 2      |
| 728        | 0           | 0      | 3      | 4     | 5          | 5     | 5       | 2        | 2          | 6     | 2      | 14   | 1      |
| 729        | 0           | 0      | 0      | 1     | 3          | 2     | 0       | 0        | 0          | 0     | 0      | 2    | 0      |
| 733        | 0           | 1      | 3      | 1     | 1          | 1     | 7       | 1        | 1          | 1     | 1      | 1    | 1      |
| clan 86    |             |        |        |       |            |       |         |          |            |       |        |      |        |
| 86         | 11          | 11     | 11     | 5     | 6          | 11    | 35      | 5        | 5          | 6     | 6      | 9    | 10     |
| 94         | 7           | 12     | 14     | 8     | 8          | 15    | 21      | 6        | 7          | 9     | 18     | 24   | 22     |
| 96         | 15          | 10     | 15     | 14    | 0          | 0     | 14      | 8        | 6          | 5     | 12     | 12   | 8      |
| 704        | 3           | 8      | 6      | 13    | 12         | 8     | 20      | 3        | 3          | 6     | 27     | 6    | 9      |
| clan 97    |             |        |        |       |            |       |         |          |            |       |        |      |        |
| 97         | 3           | 3      | 3      | 3     | 3          | 5     | 16      | 3        | 3          | 3     | 4      | 3    | 2      |
| clan 710   |             |        |        |       |            |       |         |          |            |       |        |      |        |
| 710        | 4           | 2      | 5      | 1     | 0          | 1     | 19      | 1        | 1          | 1     | 1      | 6    | 3      |
| clan 711   |             |        |        |       |            |       |         |          |            |       |        |      |        |
| 711        | 1           | 1      | 1      | 1     | 1          | 4     | 6       | 1        | 1          | 1     | 2      | 5    | 2      |
| clan 727   |             |        |        |       |            |       |         |          |            |       |        |      |        |
| 727        | 0           | 1      | 1      | 1     | 0          | 1     | 1       | 1        | 1          | 1     | 0      | 1    | 3      |
