# Supplementary material for: Genome-wide identification and expression profiling of durian CYPome related to fruit ripening
Source: PubMed Central journal article supplement (PMC8631664; doi:10.1371/journal.pone.0260665), 2021-11-30
Supplement: pone.0260665.s007.pdf [file pone.0260665.s007.pdf]

**S7 Table.** Normalized Ct values of the genes in durian arils cv. Monthong control (natural ripening), 1-MCP treatment, and ethephon treatment.

| Treatment  | Normalized Ct value |                 |                 |                  |                  |
|------------|---------------------|-----------------|-----------------|------------------|------------------|
|            | <i>DzCYP72A</i>     | <i>DzCYP88A</i> | <i>DzCYP94D</i> | <i>DzCYP707A</i> | <i>DzCYP714E</i> |
| Control 1  | 7.35                | 3.76            | 10.79           | 8.48             | 6.70             |
| Control 2  | 6.99                | 4.70            | 11.08           | 7.33             | 6.22             |
| Control 3  | 7.59                | 3.56            | 9.88            | 6.67             | 7.29             |
| Control 4  | 7.61                | 5.37            | 10.52           | 8.21             | 6.11             |
| Control 5  | 7.20                | 3.47            | 9.78            | 7.67             | 7.16             |
| MCP 1      | 9.00                | 9.68            | 9.69            | 9.25             | 11.88            |
| MCP 2      | 7.88                | 6.34            | 12.59           | 9.28             | 11.18            |
| MCP 3      | 7.80                | 7.94            | 10.33           | 10.81            | 10.90            |
| MCP 4      | 7.15                | 7.46            | 10.13           | 8.91             | 10.73            |
| MCP 5      | 7.15                | 7.82            | 10.69           | 9.56             | 13.03            |
| Ethephon 1 | 8.11                | 4.42            | 9.01            | 6.92             | 6.86             |
| Ethephon 2 | 7.77                | 3.04            | 9.56            | 7.93             | 7.55             |
| Ethephon 3 | 6.94                | 4.07            | 8.60            | 7.17             | 7.12             |
| Ethephon 4 | 8.57                | 3.18            | 9.11            | 6.93             | 7.06             |
| Ethephon 5 | 7.45                | 3.21            | 8.77            | 7.24             | 6.69             |
