# Supplementary material for: Genome-wide identification and expression profiling of durian CYPome related to fruit ripening
Source: PubMed Central journal article supplement (PMC8631664; doi:10.1371/journal.pone.0260665), 2021-11-30
Supplement: pone.0260665.s008.pdf [file pone.0260665.s008.pdf]

**S8 Table.** Normalized Ct values of the genes in durian arils (two cultivars of each stage). The abbreviations N/D indicate no detectable Ct.

| Cultivar    | Stage       | Normalized Ct value |                 |                 |                  |                  |
|-------------|-------------|---------------------|-----------------|-----------------|------------------|------------------|
|             |             | <i>DzCYP72A</i>     | <i>DzCYP88A</i> | <i>DzCYP94D</i> | <i>DzCYP707A</i> | <i>DzCYP714E</i> |
| Phuangmanee | Immature1-1 | 9.80                | 6.46            | 8.22            | 11.89            | 10.59            |
|             | Immature1-2 | 9.23                | 6.45            | 8.15            | 12.64            | 12.04            |
|             | Immature1-3 | 9.44                | 6.52            | 8.45            | 12.27            | 12.55            |
|             | Immature2-1 | 8.27                | 7.05            | 8.00            | 4.88             | 10.39            |
|             | Immature2-2 | 8.73                | 6.78            | 7.99            | 5.82             | 11.96            |
|             | Immature2-3 | 8.92                | 7.11            | 8.05            | 6.12             | 11.17            |
|             | Mature 1    | 7.45                | 8.54            | 9.90            | 4.69             | 10.32            |
|             | Mature 2    | 7.69                | 9.18            | 8.05            | 4.53             | 12.43            |
|             | Mature 3    | 7.56                | 8.50            | 8.40            | 4.42             | 11.38            |
|             | Midripe 1   | 6.59                | 1.53            | 5.20            | 6.19             | 5.54             |
|             | Midripe 2   | 6.44                | 1.58            | 5.11            | 5.15             | 4.44             |
|             | Midripe 3   | 6.46                | 1.55            | 5.64            | 5.33             | 4.58             |
|             | Ripe 1      | 5.19                | 1.01            | 3.66            | 5.62             | 5.09             |
|             | Ripe 2      | 6.02                | 1.03            | 4.38            | 5.60             | 6.21             |
|             | Ripe 3      | 5.78                | 1.64            | 3.87            | 5.59             | 5.72             |
| Monthong    | Immature1-1 | 7.37                | 7.22            | 7.83            | 7.22             | N/D              |
|             | Immature1-2 | 9.12                | 7.11            | 8.27            | 7.11             | N/D              |
|             | Immature1-3 | 8.05                | 9.34            | 8.60            | 7.88             | N/D              |
|             | Immature2-1 | 7.60                | 8.37            | 8.93            | 8.11             | N/D              |
|             | Immature2-2 | 9.54                | 9.50            | 8.87            | 8.97             | N/D              |
|             | Immature2-3 | 8.57                | 8.98            | 8.76            | 8.24             | N/D              |
|             | Mature 1    | 9.14                | 7.36            | 8.10            | 9.48             | 10.57            |
|             | Mature 2    | 10.53               | 8.76            | 7.45            | 8.42             | 10.43            |
|             | Mature 3    | 10.63               | 6.02            | 9.30            | 8.86             | 10.5             |
|             | Midripe 1   | 8.58                | 3.55            | 7.82            | 4.26             | 6.9              |
|             | Midripe 2   | 8.77                | 3.66            | 7.51            | 4.71             | 9.3              |
|             | Midripe 3   | 8.33                | 3.42            | 7.24            | 4.44             | 7.08             |
|             | Ripe 1      | 7.90                | 2.71            | 7.66            | 3.27             | 6.3              |
|             | Ripe 2      | 6.29                | 2.75            | 6.38            | 3.94             | 7.06             |
|             | Ripe 3      | 7.64                | 2.04            | 7.64            | 3.88             | 6.96             |
