# Supplementary material for: Genome-wide identification and expression profiling of durian CYPome related to fruit ripening
Source: PubMed Central journal article supplement (PMC8631664; doi:10.1371/journal.pone.0260665), 2021-11-30
Supplement: pone.0260665.s009.pdf [file pone.0260665.s009.pdf]

**S9 Table.** Normalized Ct values of the genes in durian arils (four cultivars at ripe stage).

| <b>Cultivar</b> | <b>Normalized Ct value</b> |                 |                 |                 |                 |
|-----------------|----------------------------|-----------------|-----------------|-----------------|-----------------|
|                 | <i>DzCYP72A</i>            | <i>DzCYP88A</i> | <i>DzCYP94D</i> | <i>DzCYP70A</i> | <i>DzCYP71E</i> |
| Phuangmanee 1   | 5.20                       | 1.01            | 3.66            | 5.62            | 5.09            |
| Phuangmanee 2   | 6.02                       | 1.03            | 4.38            | 5.60            | 6.21            |
| Phuangmanee 3   | 5.78                       | 1.64            | 3.87            | 5.59            | 5.72            |
| Chanee 1        | 6.49                       | 0.79            | 4.69            | 6.54            | 6.25            |
| Chanee 2        | 7.68                       | 0.34            | 4.42            | 7.15            | 5.49            |
| Chanee 3        | 6.86                       | 0.46            | 5.06            | 6.37            | 7.40            |
| Monthong 1      | 7.90                       | 2.71            | 7.66            | 3.27            | 6.30            |
| Monthong 2      | 6.29                       | 2.75            | 6.38            | 3.94            | 7.06            |
| Monthong 3      | 7.64                       | 2.04            | 7.64            | 3.88            | 6.96            |
| Kanyao 1        | 5.34                       | 2.72            | 8.60            | 6.62            | 8.29            |
| Kanyao 2        | 5.56                       | 2.39            | 8.34            | 6.95            | 7.58            |
| Kanyao 3        | 5.26                       | 2.72            | 9.17            | 6.66            | 7.55            |
