# Supplementary material for: Genome-wide identification and expression profiling of durian CYPome related to fruit ripening
Source: PubMed Central journal article supplement (PMC8631664; doi:10.1371/journal.pone.0260665), 2021-11-30
Supplement: pone.0260665.s010.pdf [file pone.0260665.s010.pdf]

**S8 Table.** List of proteins used for construction of phylogeny of selected plant cytochrome P450s involved in phytohormone biosynthesis.

| Plant names                 | Protein names (Protein ID)                                                                                                                                                                                                                                                                                                                                                                                                                                                                                                                                                                                                                                                                                                                                                                                                                                                                                                                                                                                                                                                                                                                                                                                                                                                                                                                                                                                                                                                                                                                                                                                                                                                                                                                                                                                                                                      |
|-----------------------------|-----------------------------------------------------------------------------------------------------------------------------------------------------------------------------------------------------------------------------------------------------------------------------------------------------------------------------------------------------------------------------------------------------------------------------------------------------------------------------------------------------------------------------------------------------------------------------------------------------------------------------------------------------------------------------------------------------------------------------------------------------------------------------------------------------------------------------------------------------------------------------------------------------------------------------------------------------------------------------------------------------------------------------------------------------------------------------------------------------------------------------------------------------------------------------------------------------------------------------------------------------------------------------------------------------------------------------------------------------------------------------------------------------------------------------------------------------------------------------------------------------------------------------------------------------------------------------------------------------------------------------------------------------------------------------------------------------------------------------------------------------------------------------------------------------------------------------------------------------------------|
| <i>Arabidopsis thaliana</i> | CYP72A (NP188080), CYP88A (NP001320198), CYP94B (NP001331365), CYP94C (NP180337), CYP94D (NP174713), CYP707A (CAA16713), CYP714A (NP568463)                                                                                                                                                                                                                                                                                                                                                                                                                                                                                                                                                                                                                                                                                                                                                                                                                                                                                                                                                                                                                                                                                                                                                                                                                                                                                                                                                                                                                                                                                                                                                                                                                                                                                                                     |
| <i>Citrullus lanatus</i> *  | <p>&gt;CICYP72A<br/> MWSVAATISIWILVLLLLGCKFVNWIWLKPKKLEKVLREQGFA<br/> GNSYRILYGDLKFRAAMREQALS KPMNFSNDIAPRVIPSIIHTIQN<br/> YGKNSFMWLGPIPRVHIMDPEQLKIVFSLINDFQKPTINPFARLLA<br/> DGILNHEGPKWVKHRKIINPAFHLQKLKDMVPAFYHSCNEMISK<br/> WENMVFVEESCELDVMPYLQNM TADVISRTAFGSSYEKGGKIFK<br/> LQTELAELVIQSTLGVYIPGWRFLPTKSNNKMKEISNEITTLILGIM<br/> NEREKSMKAGEAIQTDLLSILMESNLNEIKQHGNKDIGMSIEDVI<br/> AECKLFYIAGQETTATLLVWTM VLLSSYSEWQE QARA EVFEIFG<br/> NKKPDYDGLSQLKVVTMILNEVRL YPPVSMFGRFVKKETRLGK<br/> LTL PAGVMLALPTILIQRDP ELWGEDANEFKPERFSKGVSKATKN<br/> PSAFV PFGWGPRICIGLNFAMIEAKLALS MILQRFSFELSSSYTHAP<br/> TVTITTQPQHGAHILHKL</p> <p>&gt;CICYP88A<br/> MYTAVLAAVLTVA VVVLKNANHWVYETARLGLKRFALPPGDL<br/> GWPFIGNMWSFLRAFKSPYPDSFMSFFSRYGNTGMYKAFMFGS<br/> PSVIVTSAEACKRVLNDDEAFSGSWPLSTMKLIGEKSFISYQEH<br/> KRLRRITAAPVNGYDALATYLT YIEKIVVSSLEKWASMGQIEFLT<br/> HLRKLTFKIIMYIFLSSETEAIMEALEREYTELNHGVRAMAINIPGF<br/> A YKALKARKNLVATFGSIVRGRKERERKNNLR TKRRDMMDA<br/> LLDAEDEDGRRLSDEEIIDILIMYLNAGHESGHTMMWATIFLQQ<br/> HPQFLQKAKAEQEEIVKKRPPGQKGLTLKEVREMTYLSKVIDETL<br/> RVVTFSLTVFREAKHDVKISGYTIPKGWKVLVWFRSVHHDPEY<br/> PNPKEFNPSRWDDFTP KAGSFLPFGAGSRLCPGNDLAKLEISIFLH<br/> YFLLSYKMERVNPKSPVRYLPHSRPKDNCLARIKRLD</p> <p>&gt;CICYP94A<br/> MLSPLLLFFILFLLPLLFFIFIFTKTPNSPFTPPIKLPKSYPLVGSFFAV<br/> FANRRRRLQWLSVDLQVSPAATFTLHRPFGQRQIFTANPAVVQHI<br/> LKTHFHYYQKGD SFRSVFSDFLGDGIFNADGESWK FQRQVSSHEF<br/> TTKSLRKFVETVVD AELSDRLVPVLYTAAADCSVLD FQDVLQRF<br/> AFDNVCKIAFGYDPAYLSPSFGQSKFAKAFEDAVRISSLRFQSLIPF<br/> VWKLKFLDIGSEKRLRIAIAEVRGYANNIINDKKT ELKTNSSIPS<br/> VDLLSRFLTSGHSDHNFITDIIISFILAGQDTTSAALTWFFWLLAKY<br/> PQVEIRILEEISQKTEDLFGYDEVKDLTYTHAALCESMRLYPPVPV<br/> DGKQAAADDVLPDGTAVRKGERVAYHPYAMGRMEAIWGKDW<br/> AKFRPERWLES DSGDEATEVKWRFVGRDNYTYPVFQAGPRICLG<br/> KEMAFLQM KRMVAGILKRFRVVPAAAE EGVPRFVQYMTAKM<br/> EGGFPVRIEVREGSE</p> |

| Plant names | Protein names (Protein ID)                                                                                                                                                                                                                                                                                                                                                                                                                                                                                                                                                                                                                                                                                                                                                                                                                                                                                                                                                                                                                                                                                                                                                                                                                                                                                                                                                                                                                                                                                                                                                                                                                                                                                                                                                                                                                                                                                                                                                                                                                                                                                 |
|-------------|------------------------------------------------------------------------------------------------------------------------------------------------------------------------------------------------------------------------------------------------------------------------------------------------------------------------------------------------------------------------------------------------------------------------------------------------------------------------------------------------------------------------------------------------------------------------------------------------------------------------------------------------------------------------------------------------------------------------------------------------------------------------------------------------------------------------------------------------------------------------------------------------------------------------------------------------------------------------------------------------------------------------------------------------------------------------------------------------------------------------------------------------------------------------------------------------------------------------------------------------------------------------------------------------------------------------------------------------------------------------------------------------------------------------------------------------------------------------------------------------------------------------------------------------------------------------------------------------------------------------------------------------------------------------------------------------------------------------------------------------------------------------------------------------------------------------------------------------------------------------------------------------------------------------------------------------------------------------------------------------------------------------------------------------------------------------------------------------------------|
|             | <p>&gt;CICYP94B<br/> MIYFSVSFLLLSSSLWAFLLYLCSKFCFSRKRKYSPSPSYPPFG<br/> CLISFYKNRRLLAWYTDLLSDSPTQTIVVHRLGSRRTVVTANPA<br/> NVEHMLKTNFINYPKGKPFDTILDGDLGCGIFNVDGDLWSSQRKL<br/> ASHAFSAKSLREFVVKLEDEVHLRLIPLLSNAARTNAVIDLQDV<br/> LGRLAFDTVCKVTLGTDEQCLDMSRPIPEIVNAFDATATGISAKRAI<br/> APLFLTWKAKRMLNVGSEKKLKEAVQMVQKWVSNIRNKNNT<br/> LHNHNQTHNNDLLSRLSTNHDEEVVRDMIISFIMAGRDTTSA<br/> MTWLFWLLTKHPKAEQAIINEATSLSDDSKTMSLGYGYEELKDM<br/> KYLKACLCEMRLYPPVAWDSKHAAAADILPDGTPVRKGDRTV<br/> YFPYGMGRMEEVWGKDRLEFKPDRWFQNGELKTVSPFKFPVFQ<br/> AGPRMCLGMEMAFIQMKYVVATVLNRFEFPASENSPVFVPLLT<br/> AHMAGGLRVYVRERIEQKSTMW</p> <p>&gt;CICYP94C<br/> MSGSELLFSLPTAISLLFFSFTAFTIFSFLYLRLNPCCNCCVCRS<br/> YLSSWSFSFPNLSDWYTHLLSLPTATIHLVLSNIVTANPDNVQ<br/> HILKSNFHNYPKGKPFSSILGDLLGHGIFNVDGHSWRFQRKMASL<br/> ELGSLSLRSHAFEILTQIQTRLVPVMKDVGEVDLQDVFRFSD<br/> NICRFSGLDPGCLRLCLPISEFAVAFDLASRLSAERAMAASPIW<br/> KIKRVLRVGSERKLREAIKMVDGLAMEVIRQRREMGSFHRNDLL<br/> SRFMASNDDRYLDRDIVVSFLLAGRDTVASALTSFLWLLSQNPEV<br/> ETKIISEDRIIMPDRDTPNFDNLKDMHYLQAAVYENMRLFPV<br/> QFDSKFAEEDDILPDGTFVQKGRVTVYHPYAMGRMDRIWGPDC<br/> EFKPERWLKNGYFAPENPFKFPVFQAGLRVCLGKELAVMDVKC<br/> VAVLIRKFKIRLAADRVARFAPGLTASWRGGLPVRIERTTC</p> <p>&gt;CICYP94D<br/> MDISVLSVLTLPFIFLTFLSLSLYLLFFTSPNTKSKPHQGFKHFPL<br/> VGTLPLFLLNRHRFLDWSTEVLKSCRTNTAVFKRPGKVHGVITA<br/> NPLVVEHILKTQFENYPKGERFISLLEDFLGRGIFNSDGEIWKVQR<br/> KTASYEFNTKSLRNFMENVRVEVQSRLLPFGKACETERILDQ<br/> DVLERFAFDNVCKLAFNYDPAACLGDDGTAAAEFMRAFEDAATL<br/> SSGRFMYAFPGLYKVKKFLNIGSERSLKEAIAIVHKFADDIISRM<br/> EEKKRTQIEKDQDLLSRFMGDENNSPEFLRDIISFILAGRDTTSSA<br/> LTWFFWILSSRPDVEQKILTELQTISSRTHKEIGEMYGFDQLRDM<br/> QYLQAALSETLRLYPPVPVDTKACRNDDVLPDGTFIGKSWFVTV<br/> HTYAMGRMESIWGKNYGEFSPERWLQNGVCKTESPFRFPIFHAG<br/> PRMCLGKDMAIYQMKIAAAVIEKFEVEMVEKKKTPKHLLSLTL<br/> RMENGLQVMVKKRDRSMPI</p> <p>&gt;CICYP707A<br/> MFAFVLLLLLVLLFFHFLFKFSAPALRKLPLPPGSMGWPYLGET<br/> LQLYSQDPNVFFASKKKRYGPIFKSHILGYPCVMVSSPEAAKFVL<br/> VTKAHLFKPTFPASKERMLGKNAIFFHQGDYHAKLRRLVLRFTM<br/> PEAIRNIVPSIESIAKNTVQSWDGLINTFQEMKMFVSLLSIFG<br/> KDEALYFEDLKRCYYILEKGYNSMPINLPGTLFHKAMKARKELA</p> |

| Plant names              | Protein names (Protein ID)                                                                                                                                                                                                                                                                                                                                                                                                                                                                                                                                                                                                                                                                                                                                                                                                                                                                                                                                                                                                                                                                                                                                                                                                                                                                                                                                                                                                                                                                                                                               |
|--------------------------|----------------------------------------------------------------------------------------------------------------------------------------------------------------------------------------------------------------------------------------------------------------------------------------------------------------------------------------------------------------------------------------------------------------------------------------------------------------------------------------------------------------------------------------------------------------------------------------------------------------------------------------------------------------------------------------------------------------------------------------------------------------------------------------------------------------------------------------------------------------------------------------------------------------------------------------------------------------------------------------------------------------------------------------------------------------------------------------------------------------------------------------------------------------------------------------------------------------------------------------------------------------------------------------------------------------------------------------------------------------------------------------------------------------------------------------------------------------------------------------------------------------------------------------------------------|
|                          | <p>HILNKILSTRREMKRDNHNDLLGSFMGEKEGLTDEQIADNVIGLIFA<br/> ARDTTASVLTWILKYLGENPSVLQAVTAEQEAIMKQKQSGDDNL<br/> TWADTKNMPITSRVIQETLRMASVLSFTFREA VEDVEFDGYLIPK<br/> GWKVLPLFRNIHSPENFPQPKFDPTRFEVAQKPNTYMPFGNGT<br/> HSCPGNELAKLEMLVLLHHLTKYRWNVVGAQEGIQYGPFALPL<br/> NGLPIKIFLKK<br/> &gt;CICYP714<br/> MEGSIIGGFVSVFPVAVAVTVVAILVHLYFYGAWRRTAEVRRKL<br/> RAQGVIGPPPSVLYGNLPEMQKIQLQTAAMASPPHGASAIHAHDY<br/> TSTLFPYFVEWRKQYGPLYTYSTGMRQHLYANKVELVKDLNFSN<br/> NINLGKPFYVTKKLAPILGHSVVRNNGAVWAVQRKIIAPEFFMDR<br/> VRAMVGLMADAALCLIDKWESRIGDGATAEIEVDEDLRGFSADV<br/> ISRACFGSWYEKGKEIFSKLRDLQRLVSEGSFLFGYISLSDRFFQRS<br/> KHRIKKLEKEIESLIWETVQQRQKECSKTSSEKDLLQLIMEATT<br/> NDPNIGANDSSKNFIVDNCKSIYFAGHESTAVAATWSLMLLALHP<br/> EWQDCIRSEFAHACPDGHPDMAVISQLKSVSMVVHETLRLYPPA<br/> AFVARETFAEMQLGNVVVPGKVCLWTLIPSLHREVEIWGEDANK<br/> FKPERFENGIKACKFPQAYVPFGAGPRLCLGKNFALVELKIIISL<br/> VVSFRFSLSPEYRHCPYSYRMIVEPANGVKIVFQRL<br/> &gt;CICYP714E<br/> MAVMVLSVLA AVSFFIFLHFLFESLFLPKRLRSKLRNQGIDGPPSPS<br/> FLLGNLPEIKNIRAIKSHALTTTEGDDSHAGWPSNLLPHLEHWRN<br/> RYGPKFVYSSGTVQILCITDVEMVKEIGLSTTLNLGKPAHLSKDR<br/> GPLLGLGILASSGPIVHQRKTIAPELYLDRVKDMTSLMVESVKS<br/> MIKSWETIVENDGGQSELNVDSYFRTLSADIISKA WVKLSCPCKK<br/> TLVFLGSGIYISIYMGDVILFDLEKKS YAMYLPKDNREIWKLEKE<br/> IESMVLEV VKKRIKQCSKEKDLLQIIEDAKCLDVEGKSLKISGDK<br/> FIVDNCKNIYFAGHETTAITASWCLMLLAKHPDWQARVRSEVLE<br/> CCQDGTLD AETIKMKTLTMVIQETLRLYPPGVFVTREALEDLRF<br/> KNLRIPKGMHNVQLWGPVLSFNPQRFSNGILKACKNPQAYIPF<br/> GVGPHICAGQH FAMVELKIVVSLIVSKFEFSLSPSYNHSPAFSLVV<br/> EPKNGVLLHLRNLSSFSL</p> |
| <i>Cucumis sativus</i>   | <p>CYP72A (XP011659939), CYP88A (XP011656712),<br/> CYP94A (XP011658957), CYP94B (XP011651558), CYP94C<br/> (KGN64915), CYP94D (XP004136768), CYP707A (XP004150544),<br/> CYP714A (XP004146466), CYP714E (XP004138935)</p>                                                                                                                                                                                                                                                                                                                                                                                                                                                                                                                                                                                                                                                                                                                                                                                                                                                                                                                                                                                                                                                                                                                                                                                                                                                                                                                               |
| <i>Durio zibethinus</i>  | <p>CYP72A (XP022738158), CYP88A (XP022738013), CYP94A<br/> (XP022759757), CYP94A (XP022771227), CYP94D (XP022764670),<br/> CYP707A (XP022755802), CYP714E (XP022743116)</p>                                                                                                                                                                                                                                                                                                                                                                                                                                                                                                                                                                                                                                                                                                                                                                                                                                                                                                                                                                                                                                                                                                                                                                                                                                                                                                                                                                              |
| <i>Fragaria ananassa</i> | <p>CYP72A (XP004294188), CYP88A (XP011469589),<br/> CYP94D (XP004299232), FaCYP94C (XP004305353), CYP94B<br/> (XP004303976), CYP707A (XP004295971), CYP714A (XP004307754),<br/> CYP714E (XP004294859)</p>                                                                                                                                                                                                                                                                                                                                                                                                                                                                                                                                                                                                                                                                                                                                                                                                                                                                                                                                                                                                                                                                                                                                                                                                                                                                                                                                                |

| <b>Plant names</b>          | <b>Protein names (Protein ID)</b>                                                                                                                                                                                                                    |
|-----------------------------|------------------------------------------------------------------------------------------------------------------------------------------------------------------------------------------------------------------------------------------------------|
| <i>Glycine max</i>          | CYP72A (XP003531823), CYP88A (XP003546291), CYP94D (ABD97099), CYP707A (XP003534341)                                                                                                                                                                 |
| <i>Gossypium raimondii</i>  | CYP72A (XP012438179), CYP88A (XP012475722), CYP94A (XP012476259), CYP94B (XP012489010), CYP94C (XP012485820), CYP94D (XP012456972), CYP94F (XP012472918), CYP707A (XP012471298), CYP714A (XP012443451), CYP714E (XP012458489), CYP714F (XP012448130) |
| <i>Musa acuminata</i>       | CYP72A (XP009394609), CYP88A (XP009392783), CYP94B (XP009407042), CYP94C (XP009411963), CYP94D (XP009383332), CYP94E (XP009414953), CYP707A (XP009396959), CYP714B (XP009406861), CYP714C (XP009381346)                                              |
| <i>Malus domestica</i>      | CYP72A (XP008366858), CYP88A (XP028961309), CYP94A (RXH86486), CYP94B (RXH77817), CYP94C (XP008371286), CYP94D (XP008393292), CYP707A (XP008356917), CYP714A (XP008343675), CYP714E (XP008354178)                                                    |
| <i>Oryza sativa</i>         | CYP72A (XP015615867), CYP88A (XP015643774), CYP94C (XP015615638), CYP94D4 (XP015616099), CYP94E (XP015621268), CYP707A (XP015627713), CYP714B (XP015645488), CYP714C (XP015619748), CYP714D (XP015637923)                                            |
| <i>Solanum lycopersicum</i> | CYP72A (XP004242635), CYP88A (XP004229509), CYP94A (XP004242690), CYP94B (XP004233587), CYP94C (XP015086840), CYP94D (XP004249121), CYP707A (NP001362844), CYP714A (XP004235212), CYP714E (XP004229723)                                              |
| <i>Theobroma cacao</i>      | CYP72A (EOX99507), CYP88A (XP017972617), CYP94A (XP007050381), CYP94B (EOY22465), CYP94C (EOY08182), CYP94D (EOY19355), CYP707A (EOY33987), CYP714A (EOY29240), CYP714E (EOY19021), CYP714F (EOY34111)                                               |
| <i>Vitis vinifera.</i>      | CYP72A (XP002263652), CYP88A (XP002264215), CYP94A (CAN75729), CYP94B (XP002279981), CYP94C (XP002264897), CYP94D (XP002278009), CYP94F (RVX19985), CYP707A (NP001267981), CYP714A (XP002266768), CYP714E (XP002269307), CYP714F (XP002273288)       |

\* *Citrullus lanatus* cytochrome P450s are exclusively available on P450 homepage (<http://drnelson.uthsc.edu/>), without NCBI accession numbers.
